# Supplementary material for: Comprehensive evaluation of photoelectrochemical performance dependence on geometric features of ZnO nanorod electrodes
Source: Royal Society of Chemistry journal article supplement (doi:10.1039/d3na00089c), 2023-01-01
Supplement: d3na00089c1.pdf [file d3na00089c1.pdf]

## Comprehensive evaluation of photoelectrochemical performance dependence on geometric feature of ZnO nanorod electrodes

Ali Can Guler<sup>a</sup>, Jan Antos<sup>a</sup>, Milan Masar<sup>a</sup>, Michal Urbanek<sup>a</sup>, Michal Machovsky<sup>a</sup> and Ivo Kuritka<sup>\*,a,b</sup>

<sup>a</sup>Centre of Polymer Systems, Tomas Bata University in Zlin, Tr. T. Bati 5678, 760 01 Zlin, Czech Republic

<sup>b</sup>Department of Chemistry, Faculty of Technology, Tomas Bata University in Zlín, Vavrečkova 5669, 760 01 Zlín, Czech Republic

Email addresses: guler@utb.cz; antos@utb.cz; masar@utb.cz; murbanek@utb.cz; machovsky@utb.cz;

\*corresponding author: kuritka@utb.cz

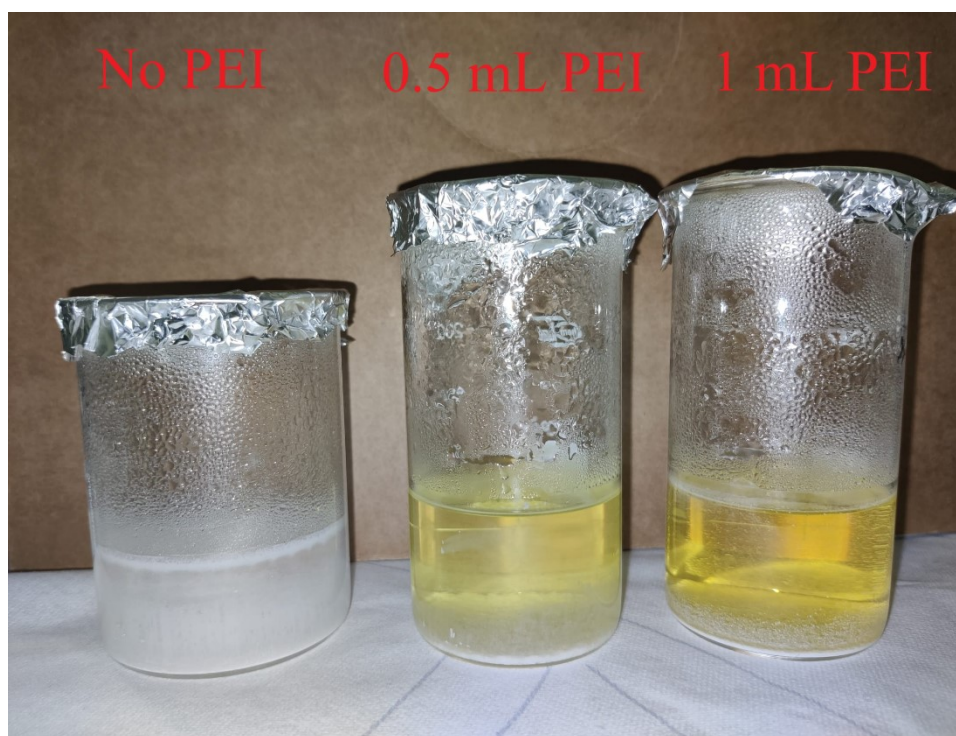

**Fig. S1** Color change of hydrothermal growth solution depending on amount of PEI surfactant.

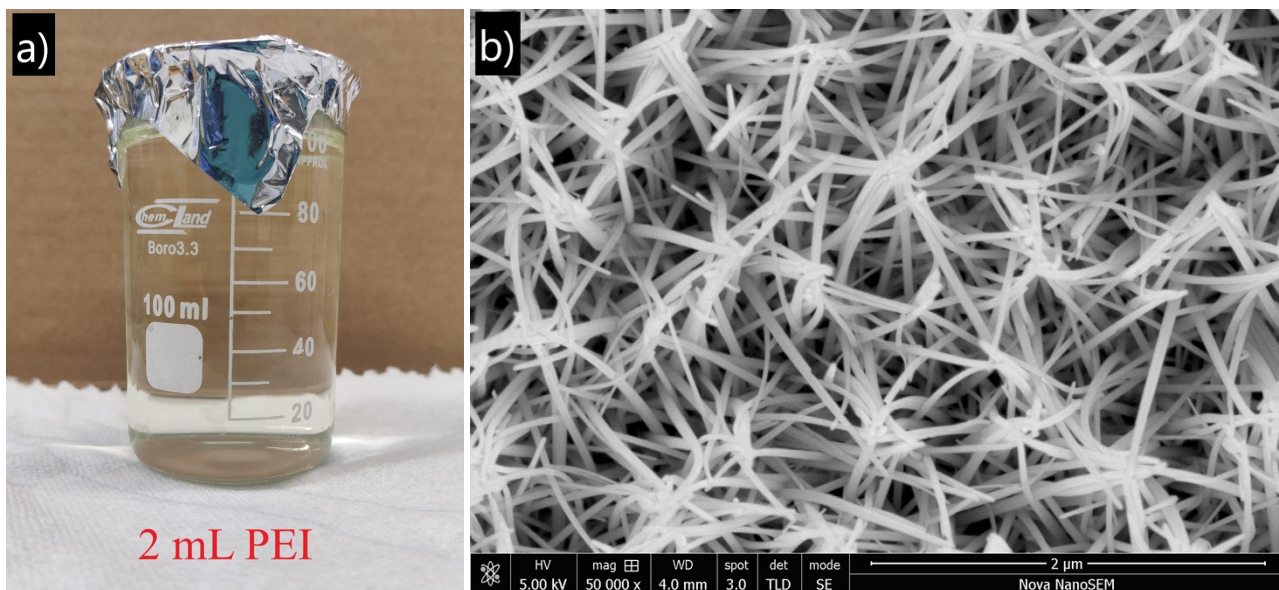

**Fig. S2** a) Hydrothermal growth solution containing 2 mL PEI and b) Corresponding SEM images of ZnO NRs prepared via hydrothermal solution containing 2 mL PEI.

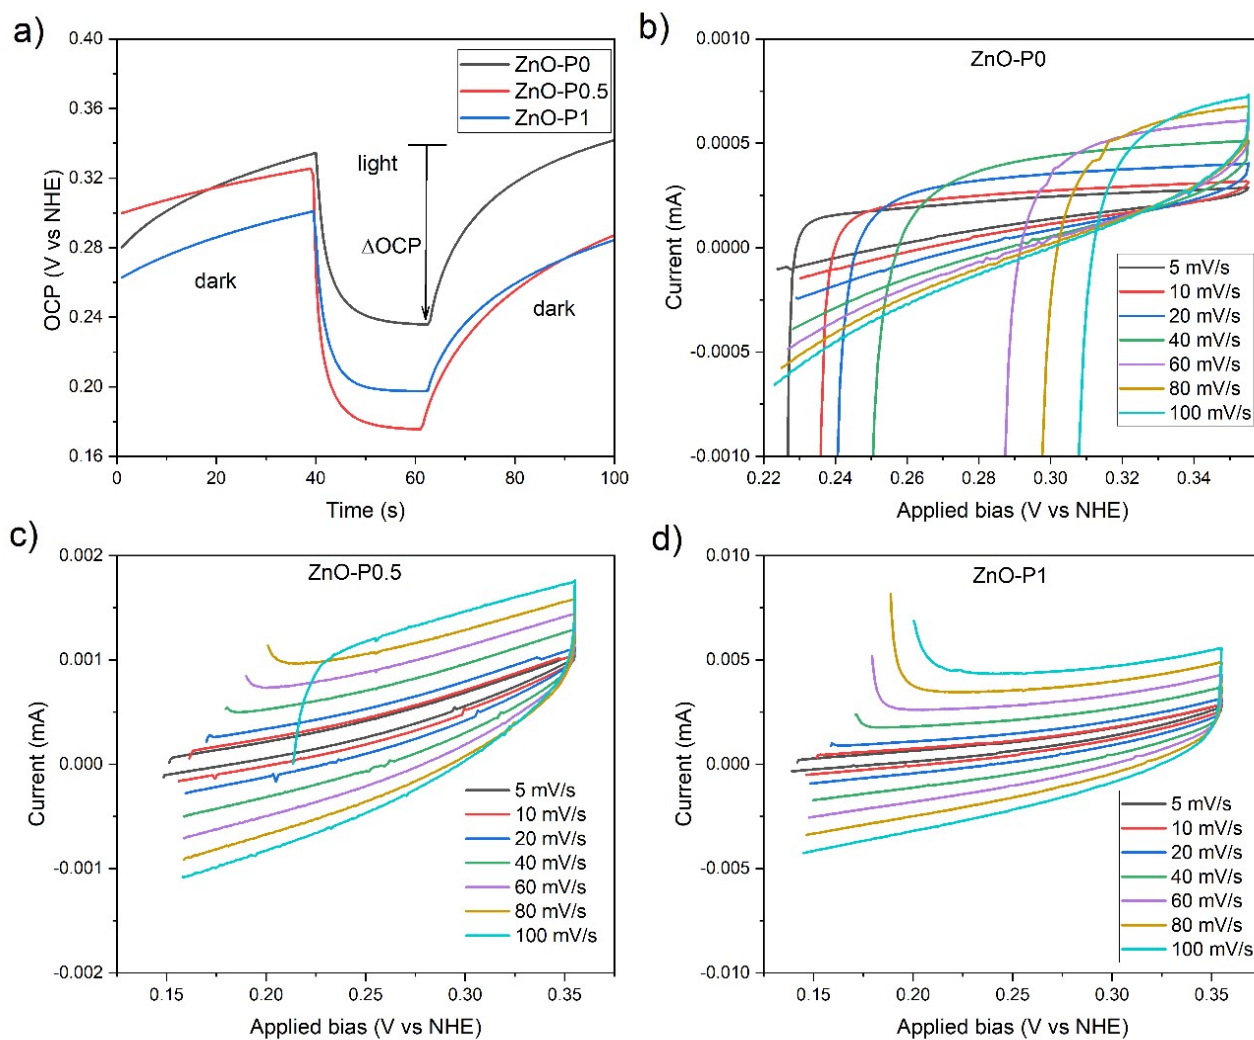

**Fig. S3** a) Open circuit potential measurements in the dark and light for the all samples. Cyclic voltammograms at various scan rates of b) ZnO-P0, c) ZnO-P0.5 and d) ZnO-P1.

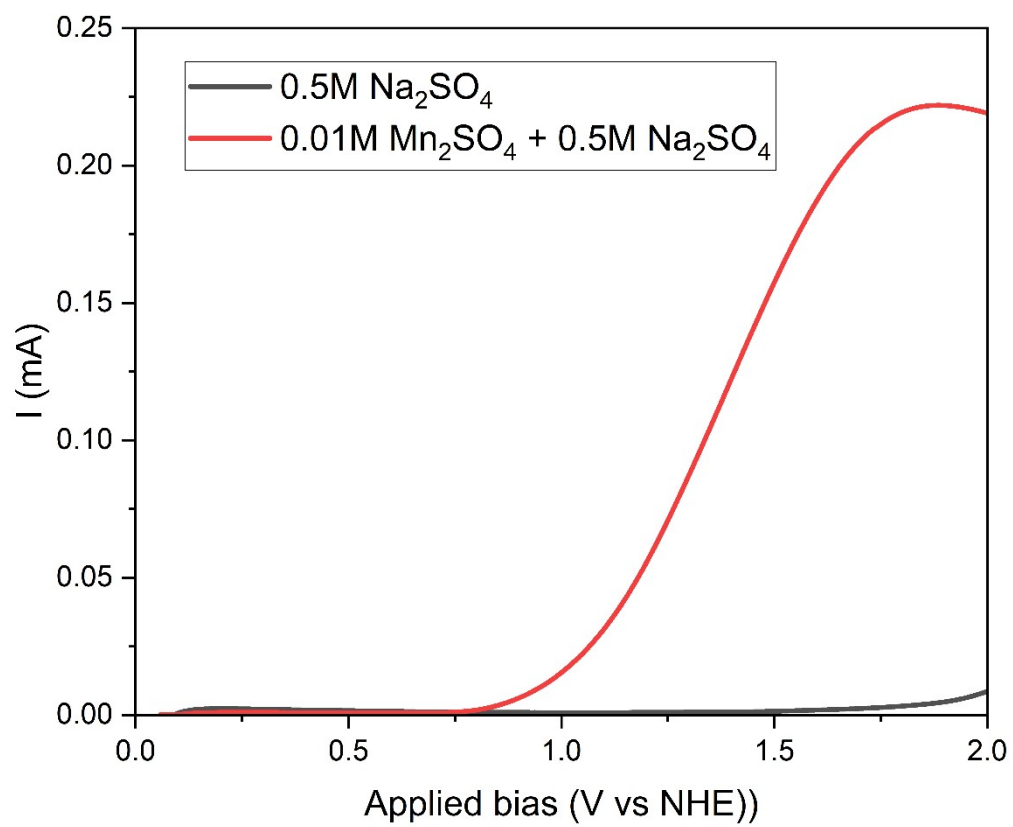

**Fig. S4** Dark current of ZnO NRs electrode in 0.5 M Na<sub>2</sub>SO<sub>4</sub> and 0.5 M Na<sub>2</sub>SO<sub>4</sub> together with 0.01 M MnSO<sub>4</sub>.

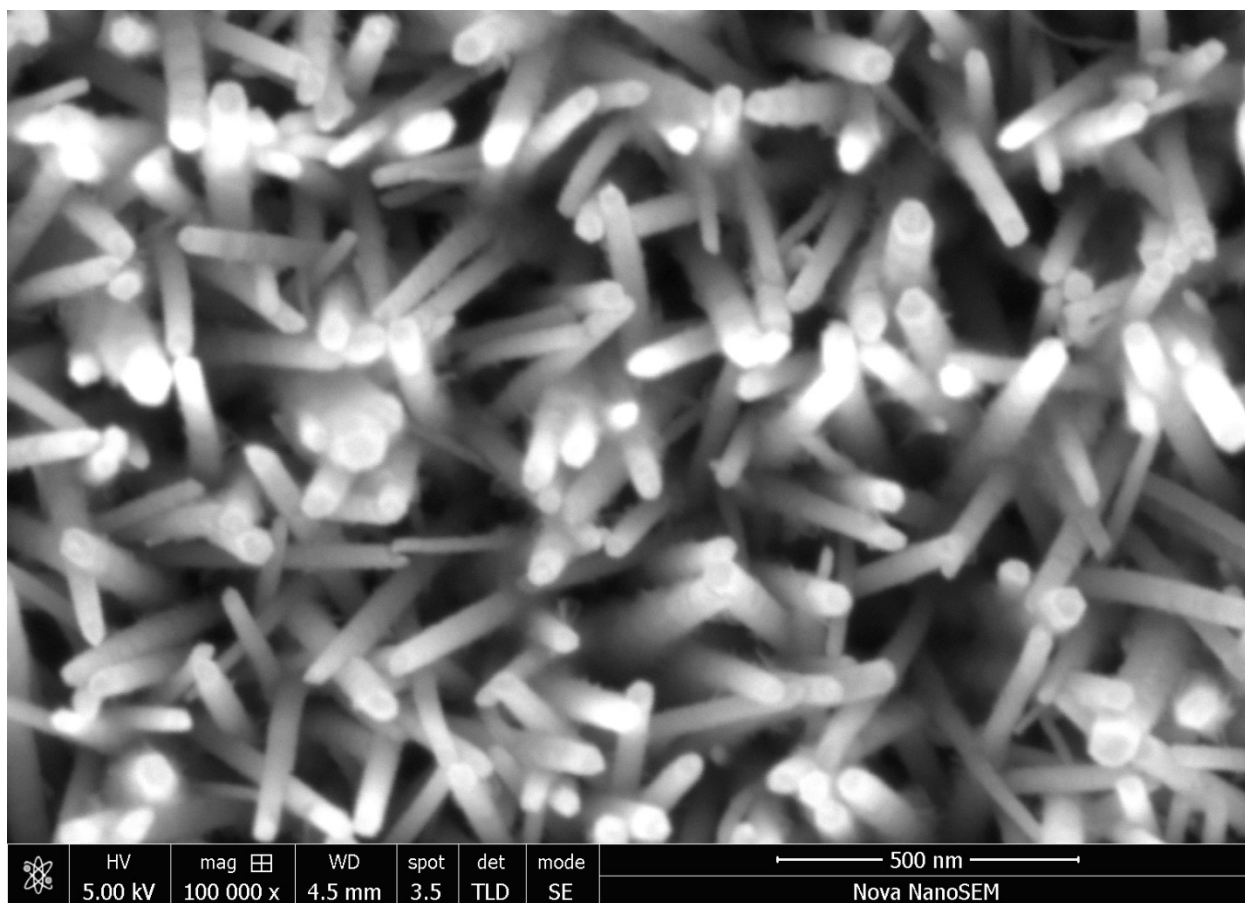

**Fig. S5** Top view SEM image of ZnO-P0.5 after photodeposition of Mn<sup>2+</sup>.

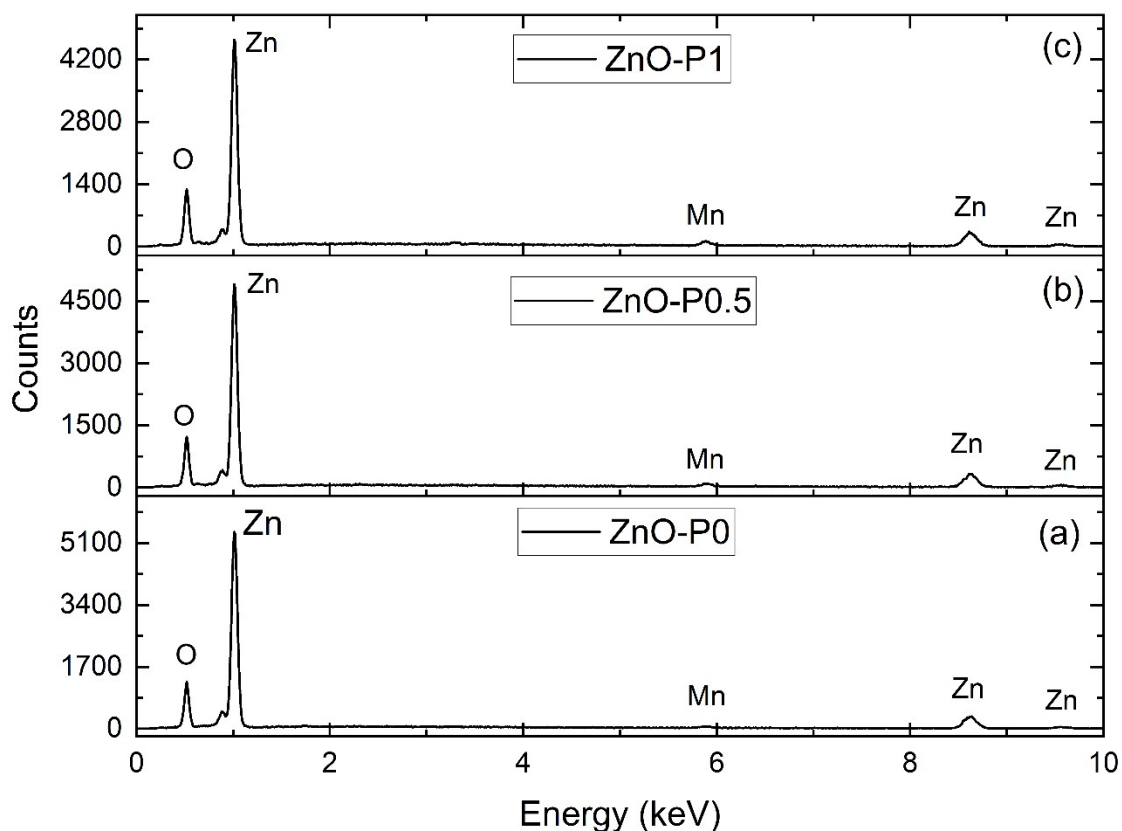

**Fig. S6** EDX spectrum of (a) ZnO-P0, (b) ZnO-P0.5 and (c) ZnO-P1 after photodeposition of  $\text{Mn}^{2+}$ .

**Table S1.** Comparative study for the PEC performances of ZnO NRs under various experimental conditions.

| Average Diameter (nm) | Synthesis method | Light source and intensity                                     | Electrolyte solution                                         | Photocurrent density ( $\text{mA}/\text{cm}^2$ ) |
|-----------------------|------------------|----------------------------------------------------------------|--------------------------------------------------------------|--------------------------------------------------|
| 45 <sup>1</sup>       | Hydrothermal     | UV LED (365 nm) with 0.4 $\text{mW}/\text{cm}^2$               | No data                                                      | 0.35 at 0.3 V vs SCE                             |
| 69 <sup>2</sup>       | Hydrothermal     | halogen lamp with 100 $\text{mW}/\text{cm}^2$                  | 0.1 M $\text{Na}_2\text{S}$ + 0.1 M $\text{Na}_2\text{SO}_3$ | 0.48 at 0.5 V vs Ag/AgCl                         |
| 120 <sup>3</sup>      | Hydrothermal     | UV LED (365 nm) with 11.5 $\text{mW}/\text{cm}^2$              | 0.1 M NaOH                                                   | 2.25 at 1 V vs RHE                               |
| No data <sup>4</sup>  | RF sputtering    | 150 W tungsten – halogen lamp with 125 $\text{mW}/\text{cm}^2$ | 0.5 M $\text{Na}_2\text{SO}_4$                               | 0.40 at 1 V vs Ag/AgCl                           |

|                  |                   |                                              |                                       |                      |
|------------------|-------------------|----------------------------------------------|---------------------------------------|----------------------|
| 400 <sup>5</sup> | Electrodeposition | 150 W Xenon lamp with 100 mW/cm <sup>2</sup> | NaOH                                  | 0.39 at 0.5 V vs SCE |
| 42 <sup>6</sup>  | MOCVD             | 300 W Xenon lamp with 100 mW/cm <sup>2</sup> | 0.5 M Na <sub>2</sub> SO <sub>4</sub> | 0.27 at 2 V vs RHE   |
| 70 <sup>7</sup>  | Hydrothermal      | Xenon lamp with 75 mW/cm <sup>2</sup>        | 0.5 M Na <sub>2</sub> SO <sub>4</sub> | 0.4 at 1.4 V vs RHE  |
| 45 in this study | Hydrothermal      | UV LED (365 nm) with 3 mW/cm <sup>2</sup>    | 0.5 M Na <sub>2</sub> SO <sub>4</sub> | 0.06 at 0.5 V vs NHE |

## References

- 1 E. S. Babu, S. K. Hong, T. S. Vo, J. R. Jeong and H. K. Cho, *Electron. Mater. Lett.*, 2015, **11**, 65–72.
- 2 H. J. Tan, Z. Zainal, Z. A. Talib, H. N. Lim, S. Shafie, S. T. Tan, K. B. Tan and N. N. Bahrudin, *Ceram. Int.*, 2021, **47**, 14194–14207.
- 3 K. Govatsi, A. Seferlis, S. G. Neophytides and S. N. Yannopoulos, *Int. J. Hydrogen Energy*, 2018, **43**, 4866–4879.
- 4 K. S. Ahn, S. Shet, T. Deutsch, C. S. Jiang, Y. Yan, M. Al-Jassim and J. Turner, *J. Power Sources*, 2008, **176**, 387–392.
- 5 A. Rokade, S. Rondiya, V. Sharma, M. Prasad, H. Pathan and S. Jadkar, *J. Solid State Electrochem.*, 2017, **21**, 2639–2648.
- 6 M. A. Hassan, A. Waseem, M. A. Johar, I. V. Bagal, J. S. Ha and S. W. Ryu, *J. Mater. Chem. A*, 2020, **8**, 8300–8312.
- 7 C. F. Liu, Y. J. Lu and C. C. Hu, *ACS Omega*, 2018, **3**, 3429–3439.
